# Supplementary material for: Bactericera cockerelli Picorna-like Virus and Three New Viruses Found Circulating in Populations of Potato/Tomato Psyllids (Bactericera cockerelli)
Source: MDPI journal article supplement (doi:10.3390/v16030415), 2024-03-08
Supplement: s1 [file s1]

**Supplemental Table S1.** List of primer pairs used in this study. The sequences for all primer pairs used for RT-PCR testing of each virus (BcTLV, BcSLV-1 and BcSLV-2) are given in the table, with start and end positions based on the corresponding contig assembled from HTS data as described in main text, T<sub>m</sub> for each primer as calculated by Primer3 implemented in Geneious Prime with default parameters, and length of predicted PCR product.

| Name       | Start | End  | Sequence                | T <sub>m</sub> (°C) | Length (bp) |
|------------|-------|------|-------------------------|---------------------|-------------|
| BcTLV_A_F  | 982   | 1001 | TTCGAACTCTTCGCGTCACA    | 60.0                | 702         |
| BcTLV_A_R  | 1664  | 1683 | CACACTCGGGTTCCGAAGAA    | 60.0                |             |
| BcTLV_B_F  | 4507  | 4526 | CCGAGCATCTCATCCAGGTC    | 60.0                | 421         |
| BcTLV_B_R  | 4908  | 4927 | GAATGGCCGACGCTGAATTC    | 60.0                |             |
| BcTLV_C_F  | 6171  | 6190 | CCTCGGAGGAAGTCCCTACA    | 60.0                | 516         |
| BcTLV_C_R  | 6667  | 6686 | CGTGTTTGTACGCGGGTTTT    | 60.0                |             |
| BcSLV1_A_F | 1573  | 1592 | GCCCTTCAAGTGCCAACTTG    | 60.0                | 467         |
| BcSLV1_A_R | 2020  | 2039 | CGTGCTTTCGATAACGGCTG    | 60.0                |             |
| BcSLV1_B_F | 4023  | 4042 | CGAGGCTCGTATGGAGAACC    | 60                  | 975         |
| BcSLV1_B_R | 4978  | 4997 | TATGTTGCCCCCATAGGGGA    | 60.0                |             |
| BcSLV2_A_F | 274   | 293  | AATGGGCAGCATTGTTTGGG    | 59.7                | 766         |
| BcSLV2_A_R | 1020  | 1039 | TGCCTGAAACCATACCCAC     | 60.0                |             |
| BcSLV2_B_F | 1189  | 1208 | AGACAACGTGGACCAAGCTC    | 60.3                | 760         |
| BcSLV2_B_R | 1929  | 1948 | CAGCCGTA CTCAACAGGAGG   | 60.1                |             |
| BcSLV2_C_F | 2849  | 2868 | GGCTGGGATTGGACAGTACA    | 59.4                | 581         |
| BcSLV2_C_R | 3407  | 3429 | GTGAGTTTTGCTCCCATCTTAGC | 59.9                |             |

Supplemental Figure S1

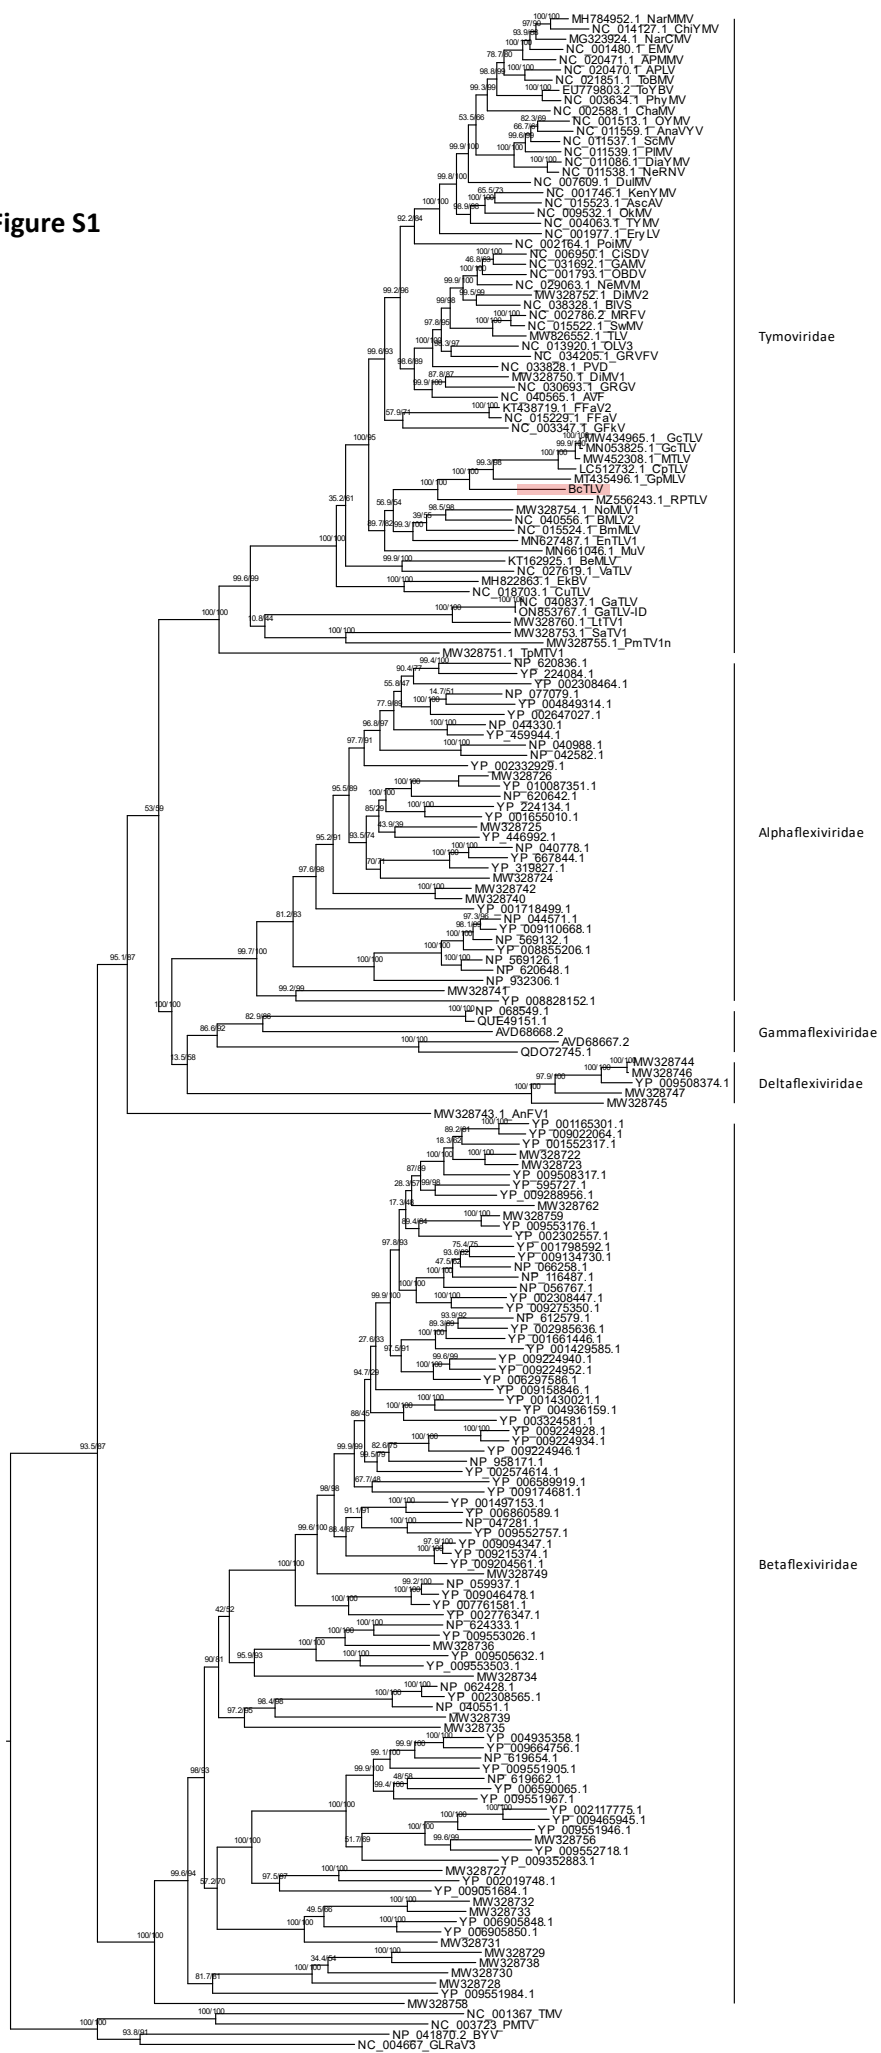

**Supplemental Figure S1.** Phylogenetic analysis of the replicase proteins of members of the order *Tymovirales*. maximum-likelihood phylogenetic tree was inferred from the alignment of the replicase aminoacid sequences from representative viruses of the *Tymovirales* order, using IQtree2 with ModelFinder to choose the best fit model and branch support estimated using SH-like approximate-ratio test (SH-aLRT) and UltraFast bootstrapping (UFbootstrap), with 1000 replicates. Both bootstrap values are indicated at the nodes (SH-aLRT/UFbootstrap). The branch for BcTLV is highlighted in light red. The tree was rooted using an outgroup comprising replicase domains of viruses from the *Martellivirales* and *Hepellivirales* orders, with the root placed on the edge connecting the ingroup and outgroup. The scale bar shows the number of substitutions per site.

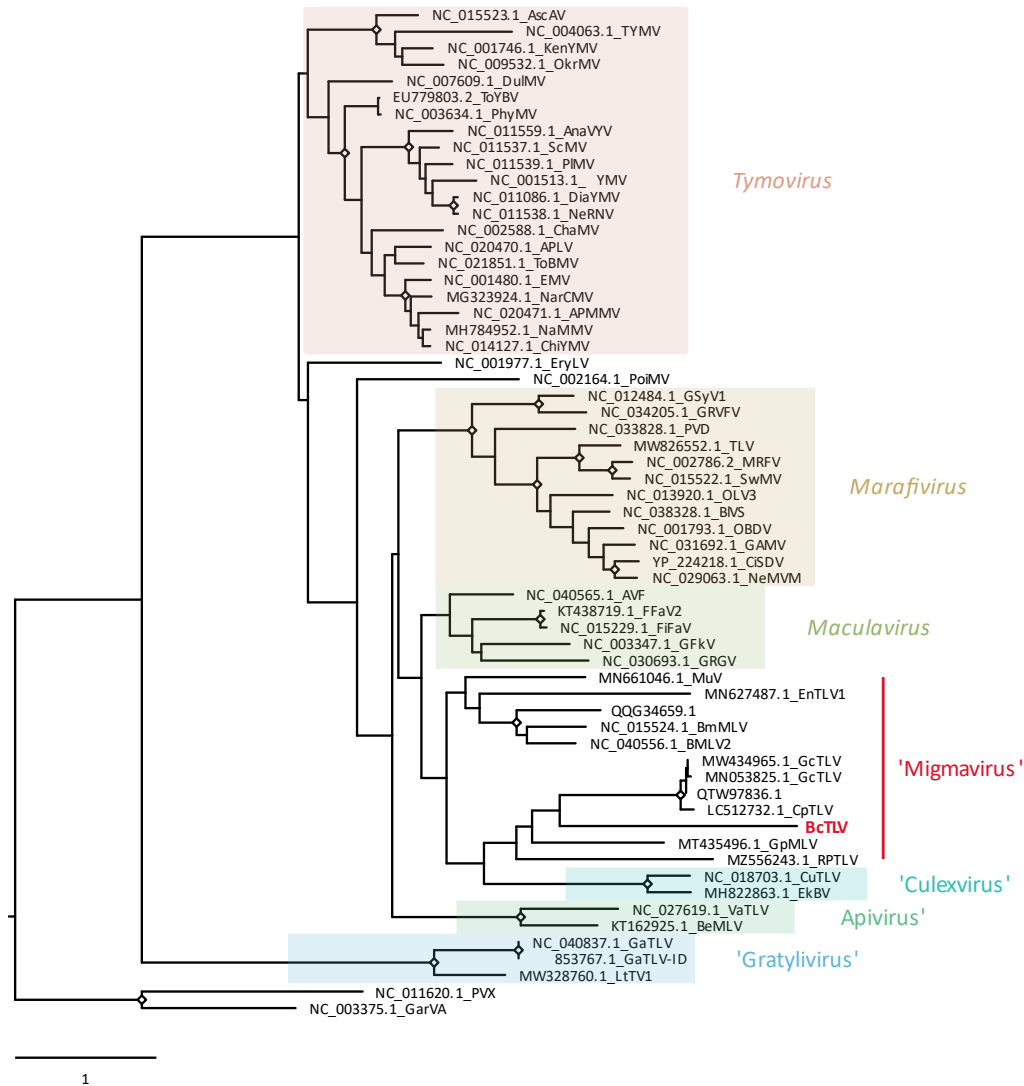

**Supplemental Figure S2.** Phylogenetic analysis of the coat proteins of members of the family *Tymoviridae*. maximum-likelihood phylogenetic tree was constructed from the alignment of the coat protein aminoacid sequences from representative viruses of the *Tymoviridae* family, using IQtree2 with ModelFinder to choose the best fit model, and branch support estimated using UltraFast bootstrapping (UFbootstrap) and SH-like approximate-ratio test (SH-aLRT). The tree was rooted using outgroup sequences of coat proteins of viruses from the *Alphaflexiviridae* family, with the root placed on the edge connecting the ingroup and outgroup. Significant bootstrap support, as estimated by SH-aLRT and UFbootstrap values, is indicated by a diamond shape at the concerned internal nodes (SH- LRT > 0% and UFbootstrap > %). The scale bar shows the number of substitutions per site.
